# Supplementary material for: Designing Adjuvant Formulations to Promote Immunogenicity and Protective Efficacy of Leptospira Immunoglobulin-Like Protein A Subunit Vaccine
Source: Front Cell Infect Microbiol. 2022 Jun 16;12:918629. doi: 10.3389/fcimb.2022.918629 (PMC9243587; doi:10.3389/fcimb.2022.918629)
Supplement: Supplementary file 3 [file Table1.xlsx]

## Sheet: Group 1_2
Group 1 LigAc alone		after the 2nd immunization
Hamster	1		500	2500	12500	62500	312500
		LigAc	0.756	0.694	0.519	0.255	0.078
		WC	0.236	0.189	0.118	0.098	0.078
		BSA	0.211	0.166	0.092	0.077	0.073
		LigAc final	0.545	0.528	0.427	0.178	0.005
		WC final	0.025	0.023	0.026	0.021	0.005
Hamster	2		500	2500	12500	62500	312500
		LigAc	0.83	0.627	0.514	0.238	0.095
		WC	0.154	0.101	0.062	0.059	0.059
		BSA	0.26	0.142	0.092	0.08	0.064
		LigAc final	0.57	0.485	0.422	0.158	0.031
		WC final	-0.106	-0.041	-0.03	-0.021	-0.005
Hamster	3		500	2500	12500	62500	312500
		LigAc	0.872	0.65	0.266	0.115	0.086
		WC	0.131	0.126	0.127	0.068	0.065
		BSA	0.052	0.075	0.072	0.06	0.099
		LigAc final	0.82	0.575	0.194	0.055	-0.013
		WC final	0.079	0.051	0.055	0.008	-0.034
Hamster	4		500	2500	12500	62500	312500
		LigAc	0.787	0.736	0.587	0.241	0.151
		WC	0.201	0.127	0.12	0.097	0.084
		BSA	0.085	0.226	0.124	0.162	0.152
		LigAc final	0.702	0.51	0.463	0.079	-0.001
		WC final	0.116	-0.099	-0.004	-0.065	-0.068
Hamster	5		500	2500	12500	62500	312500
		LigAc	0.503	0.199	0.117	0.097	0.085
		WC	0.103	0.097	0.096	0.088	0.084
		BSA	0.081	0.085	0.062	0.187	0.1
		LigAc final	0.422	0.114	0.055	-0.09	-0.015
		WC final	0.022	0.012	0.034	-0.099	-0.016
Hamster	6		500	2500	12500	62500	312500
		LigAc	0.911	0.663	0.278	0.175	0.127
		WC	0.283	0.135	0.089	0.075	0.057
		BSA	0.06	0.128	0.107	0.062	0.093
		LigAc final	0.851	0.535	0.171	0.113	0.034
		WC final	0.223	0.007	-0.018	0.013	-0.036
Hamster	7		500	2500	12500	62500	312500
		LigAc	0.813	0.724	0.367	0.144	0.132
		WC	0.212	0.115	0.068	0.068	0.049
		BSA	0.084	0.083	0.079	0.057	0.053
		LigAc final	0.729	0.641	0.288	0.087	0.079
		WC final	0.128	0.032	-0.011	0.011	-0.004
Hamster	8		500	2500	12500	62500	312500
		LigAc	0.668	0.233	0.123	0.103	0.091
		WC	0.262	0.101	0.073	0.066	0.062
		BSA	0.114	0.078	0.084	0.079	0.064
		LigAc final	0.554	0.155	0.039	0.024	0.027
		WC final	0.148	0.023	-0.011	-0.013	-0.002

## Sheet: Group 2_2
Group 2 LigAc LMQ		after the 2nd immunization
Hamster	1		500	2500	12500	62500	312500
		LigAc	0.764	0.748	0.708	0.656	0.252
		WC	0.651	0.288	0.095	0.092	0.074
		BSA	0.188	0.175	0.158	0.128	0.084
		LigAc final	0.576	0.573	0.55	0.528	0.168
		WC final	0.463	0.113	-0.063	-0.036	-0.01
Hamster	2		500	2500	12500	62500	312500
		LigAc	0.718	0.708	0.695	0.584	0.257
		WC	0.163	0.134	0.131	0.109	0.102
		BSA	0.074	0.063	0.053	0.052	0.05
		LigAc final	0.644	0.645	0.642	0.532	0.207
		WC final	0.089	0.071	0.078	0.057	0.052
Hamster	3		500	2500	12500	62500	312500
		LigAc	0.762	0.756	0.723	0.599	0.269
		WC	0.159	0.097	0.073	0.068	0.054
		BSA	0.121	0.094	0.071	0.068	0.066
		LigAc final	0.641	0.662	0.652	0.531	0.203
		WC final	0.038	0.003	0.002	0	-0.012
Hamster	4		500	2500	12500	62500	312500
		LigAc	0.827	0.725	0.693	0.563	0.274
		WC	0.089	0.056	0.05	0.045	0.041
		BSA	0.075	0.058	0.056	0.05	0.049
		LigAc final	0.752	0.667	0.637	0.513	0.225
		WC final	0.014	-0.002	-0.006	-0.005	-0.008
Hamster	5		500	2500	12500	62500	312500
		LigAc	0.795	0.768	0.689	0.529	0.116
		WC	0.529	0.192	0.134	0.11	0.098
		BSA	0.109	0.09	0.072	0.047	0.039
		LigAc final	0.686	0.678	0.617	0.482	0.077
		WC final	0.42	0.102	0.062	0.063	0.059
Hamster	6		500	2500	12500	62500	312500
		LigAc	0.86	0.846	0.808	0.704	0.312
		WC	0.439	0.265	0.134	0.107	0.083
		BSA	0.135	0.062	0.061	0.06	0.058
		LigAc final	0.725	0.784	0.747	0.644	0.254
		WC final	0.304	0.203	0.073	0.047	0.025
Hamster	7		500	2500	12500	62500	312500
		LigAc	0.748	0.713	0.66	0.34	0.169
		WC	0.111	0.093	0.071	0.068	0.062
		BSA	0.211	0.166	0.085	0.078	0.066
		LigAc final	0.537	0.547	0.575	0.262	0.103
		WC final	-0.1	-0.073	-0.014	-0.01	-0.004
Hamster	8		500	2500	12500	62500	312500
		LigAc	0.833	0.792	0.738	0.567	0.177
		WC	0.392	0.138	0.069	0.055	0.053
		BSA	0.071	0.061	0.06	0.054	0.05
		LigAc final	0.762	0.731	0.678	0.513	0.127
		WC final	0.321	0.077	0.009	0.001	0.003

## Sheet: Group 3_2
Group 3 LigAc LQ		after the 2nd immunization
Hamster	1		500	2500	12500	62500	312500
		LigAc	0.842	0.757	0.722	0.458	0.198
		WC	0.19	0.081	0.092	0.071	0.106
		BSA	0.144	0.115	0.093	0.063	0.052
		LigAc final	0.698	0.642	0.629	0.395	0.146
		WC final	0.046	-0.034	-0.001	0.008	0.054
Hamster	2		500	2500	12500	62500	312500
		LigAc	0.823	0.761	0.731	0.467	0.205
		WC	0.255	0.16	0.136	0.088	0.076
		BSA	0.123	0.096	0.078	0.071	0.07
		LigAc final	0.7	0.665	0.653	0.396	0.135
		WC final	0.132	0.064	0.058	0.017	0.006
Hamster	3		500	2500	12500	62500	312500
		LigAc	0.815	0.73	0.654	0.458	0.176
		WC	0.13	0.07	0.067	0.061	0.045
		BSA	0.159	0.148	0.147	0.091	0.086
		LigAc final	0.656	0.582	0.507	0.367	0.09
		WC final	-0.029	-0.078	-0.08	-0.03	-0.041
Hamster	4		500	2500	12500	62500	312500
		LigAc	0.785	0.768	0.733	0.5	0.268
		WC	0.105	0.096	0.074	0.063	0.054
		BSA	0.177	0.109	0.099	0.089	0.085
		LigAc final	0.608	0.659	0.634	0.411	0.183
		WC final	-0.072	-0.013	-0.025	-0.026	-0.031
Hamster	5		500	2500	12500	62500	312500
		LigAc	0.811	0.789	0.747	0.622	0.207
		WC	0.426	0.171	0.105	0.093	0.065
		BSA	0.086	0.084	0.07	0.069	0.06
		LigAc final	0.725	0.705	0.677	0.553	0.147
		WC final	0.34	0.087	0.035	0.024	0.005
Hamster	6		500	2500	12500	62500	312500
		LigAc	0.771	0.752	0.688	0.514	0.118
		WC	0.287	0.144	0.109	0.07	0.061
		BSA	0.091	0.07	0.047	0.046	0.041
		LigAc final	0.68	0.682	0.641	0.468	0.077
		WC final	0.196	0.074	0.062	0.024	0.02
Hamster	7		500	2500	12500	62500	312500
		LigAc	0.772	0.72	0.66	0.462	0.197
		WC	0.138	0.185	0.165	0.141	0.063
		BSA	0.071	0.048	0.048	0.047	0.04
		LigAc final	0.701	0.672	0.612	0.415	0.157
		WC final	0.067	0.137	0.117	0.094	0.023
Hamster	8		500	2500	12500	62500	312500
		LigAc	0.787	0.765	0.739	0.634	0.16
		WC	0.396	0.151	0.118	0.119	0.08
		BSA	0.059	0.054	0.054	0.068	0.055
		LigAc final	0.728	0.711	0.685	0.566	0.105
		WC final	0.337	0.097	0.064	0.051	0.025

## Sheet: Group 4_2
Group 4 LigAc LQuil		after the 2nd immunization
Hamster	1		500	2500	12500	62500	312500
		LigAc	0.806	0.737	0.669	0.527	0.187
		WC	0.131	0.11	0.081	0.075	0.062
		BSA	0.109	0.082	0.062	0.055	0.042
		LigAc final	0.697	0.655	0.607	0.472	0.145
		WC final	0.022	0.028	0.019	0.02	0.02
Hamster	2		500	2500	12500	62500	312500
		LigAc	0.758	0.748	0.686	0.376	0.161
		WC	0.209	0.12	0.083	0.062	0.072
		BSA	0.059	0.069	0.057	0.048	0.078
		LigAc final	0.699	0.679	0.629	0.328	0.083
		WC final	0.15	0.051	0.026	0.014	-0.006
Hamster	3		500	2500	12500	62500	312500
		LigAc	0.765	0.71	0.659	0.326	0.136
		WC	0.203	0.104	0.079	0.06	0.052
		BSA	0.07	0.056	0.05	0.049	0.045
		LigAc final	0.695	0.654	0.609	0.277	0.091
		WC final	0.133	0.048	0.029	0.011	0.007
Hamster	4		500	2500	12500	62500	312500
		LigAc	0.764	0.755	0.696	0.608	0.289
		WC	0.186	0.096	0.064	0.062	0.056
		BSA	0.082	0.078	0.061	0.06	0.06
		LigAc final	0.682	0.677	0.635	0.548	0.229
		WC final	0.104	0.018	0.003	0.002	-0.004
Hamster	5		500	2500	12500	62500	312500
		LigAc	0.946	0.783	0.738	0.626	0.287
		WC	0.231	0.131	0.1319	0.106	0.09
		BSA	0.145	0.143	0.104	0.087	0.072
		LigAc final	0.801	0.64	0.634	0.539	0.215
		WC final	0.086	-0.012	0.0279	0.019	0.018
Hamster	6		500	2500	12500	62500	312500
		LigAc	0.782	0.708	0.601	0.407	0.161
		WC	0.157	0.138	0.119	0.096	0.073
		BSA	0.185	0.163	0.161	0.16	0.128
		LigAc final	0.597	0.545	0.44	0.247	0.033
		WC final	-0.028	-0.025	-0.042	-0.064	-0.055
Hamster	7		500	2500	12500	62500	312500
		LigAc	0.802	0.764	0.676	0.398	0.24
		WC	0.168	0.164	0.116	0.098	0.085
		BSA	0.163	0.089	0.082	0.077	0.063
		LigAc final	0.639	0.675	0.594	0.321	0.177
		WC final	0.005	0.075	0.034	0.021	0.022
Hamster	8		500	2500	12500	62500	312500
		LigAc	0.848	0.789	0.756	0.491	0.269
		WC	0.384	0.22	0.221	0.166	0.136
		BSA	0.18	0.159	0.121	0.105	0.086
		LigAc final	0.668	0.63	0.635	0.386	0.183
		WC final	0.204	0.061	0.1	0.061	0.05

## Sheet: Group 5_2
Group 5 LigAc SQuil		after the 2nd immunization
Hamster	1		500	2500	12500	62500	312500
		LigAc	0.856	0.788	0.731	0.46	0.241
		WC	0.236	0.183	0.164	0.163	0.12
		BSA	0.139	0.137	0.112	0.086	0.062
		LigAc final	0.717	0.651	0.619	0.374	0.179
		WC final	0.097	0.046	0.052	0.077	0.058
Hamster	2		500	2500	12500	62500	312500
		LigAc	0.827	0.755	0.699	0.437	0.195
		WC	0.323	0.136	0.094	0.093	0.061
		BSA	0.107	0.07	0.064	0.061	0.06
		LigAc final	0.72	0.685	0.635	0.376	0.135
		WC final	0.216	0.066	0.03	0.032	0.001
Hamster	3		500	2500	12500	62500	312500
		LigAc	0.803	0.738	0.694	0.486	0.224
		WC	0.256	0.122	0.071	0.055	0.044
		BSA	0.092	0.081	0.074	0.056	0.053
		LigAc final	0.711	0.657	0.62	0.43	0.171
		WC final	0.164	0.041	-0.003	-0.001	-0.009
Hamster	4		500	2500	12500	62500	312500
		LigAc	0.752	0.748	0.733	0.502	0.25
		WC	0.254	0.253	0.242	0.204	0.175
		BSA	0.091	0.087	0.069	0.068	0.056
		LigAc final	0.661	0.661	0.664	0.434	0.194
		WC final	0.163	0.166	0.173	0.136	0.119
Hamster	5		500	2500	12500	62500	312500
		LigAc	0.847	0.8	0.793	0.635	0.245
		WC	0.292	0.132	0.129	0.079	0.062
		BSA	0.166	0.114	0.094	0.077	0.059
		LigAc final	0.681	0.686	0.699	0.558	0.186
		WC final	0.126	0.018	0.035	0.002	0.003
Hamster	6		500	2500	12500	62500	312500
		LigAc	0.924	0.854	0.728	0.474	0.304
		WC	0.436	0.384	0.348	0.216	0.187
		BSA	0.304	0.244	0.216	0.205	0.148
		LigAc final	0.62	0.61	0.512	0.269	0.156
		WC final	0.132	0.14	0.132	0.011	0.039
Hamster	7		500	2500	12500	62500	312500
		LigAc	0.795	0.746	0.741	0.681	0.301
		WC	0.345	0.151	0.148	0.144	0.119
		BSA	0.12	0.118	0.097	0.086	0.076
		LigAc final	0.675	0.628	0.644	0.595	0.225
		WC final	0.225	0.033	0.051	0.058	0.043
Hamster	8		500	2500	12500	62500	312500
		LigAc	0.821	0.767	0.698	0.473	0.248
		WC	0.163	0.139	0.122	0.093	0.08
		BSA	0.277	0.244	0.135	0.115	0.088
		LigAc final	0.544	0.523	0.563	0.358	0.16
		WC final	-0.114	-0.105	-0.013	-0.022	-0.008

## Sheet: Group 1_3
Group 1 LigAc alone		after the 3rd immunization
Hamster	1		500	2500	12500	62500	312500
		LigAc	0.756	0.63	0.492	0.273	0.092
		WC	0.435	0.236	0.189	0.118	0.098
		BSA	0.091	0.071	0.07	0.06	0.056
		LigAc final	0.665	0.559	0.422	0.213	0.036
		WC final	0.344	0.165	0.119	0.058	0.042
Hamster	2		500	2500	12500	62500	312500
		LigAc	0.836	0.644	0.546	0.29	0.158
		WC	0.22	0.154	0.101	0.059	0.059
		BSA	0.084	0.069	0.065	0.057	0.051
		LigAc final	0.752	0.575	0.481	0.233	0.107
		WC final	0.136	0.085	0.036	0.002	0.008
Hamster	3		500	2500	12500	62500	312500
		LigAc	0.772	0.692	0.562	0.258	0.118
		WC	0.185	0.131	0.127	0.068	0.065
		BSA	0.066	0.056	0.055	0.051	0.051
		LigAc final	0.706	0.636	0.507	0.207	0.067
		WC final	0.119	0.075	0.072	0.017	0.014
Hamster	4		500	2500	12500	62500	312500
		LigAc	0.777	0.765	0.713	0.312	0.132
		WC	0.208	0.127	0.101	0.084	0.097
		BSA	0.065	0.062	0.056	0.05	0.046
		LigAc final	0.712	0.703	0.657	0.262	0.086
		WC final	0.143	0.065	0.045	0.034	0.051
Hamster	5		500	2500	12500	62500	312500
		LigAc	0.797	0.317	0.139	0.09	0.075
		WC	0.218	0.096	0.088	0.103	0.084
		BSA	0.079	0.08	0.078	0.115	0.047
		LigAc final	0.718	0.237	0.061	-0.025	0.028
		WC final	0.139	0.016	0.01	-0.012	0.037
Hamster	6		500	2500	12500	62500	312500
		LigAc	0.738	0.665	0.495	0.197	0.096
		WC	0.316	0.183	0.135	0.075	0.057
		BSA	0.095	0.056	0.055	0.053	0.05
		LigAc final	0.643	0.609	0.44	0.144	0.046
		WC final	0.221	0.127	0.08	0.022	0.007
Hamster	7		500	2500	12500	62500	312500
		LigAc	0.785	0.686	0.411	0.152	0.083
		WC	0.462	0.212	0.115	0.068	0.068
		BSA	0.065	0.063	0.052	0.047	0.042
		LigAc final	0.72	0.623	0.359	0.105	0.041
		WC final	0.397	0.149	0.063	0.021	0.026
Hamster	8		500	2500	12500	62500	312500
		LigAc	0.749	0.338	0.113	0.073	0.07
		WC	0.627	0.262	0.101	0.066	0.063
		BSA	0.074	0.061	0.054	0.054	0.05
		LigAc final	0.675	0.277	0.059	0.019	0.02
		WC final	0.553	0.201	0.047	0.012	0.013

## Sheet: Group 2_3
Group 2 LigAc LMQ		after the 3rd immunization
Hamster	1		500	2500	12500	62500	312500
		LigAc	0.781	0.744	0.712	0.569	0.283
		WC	0.451	0.209	0.128	0.095	0.092
		BSA	0.069	0.068	0.056	0.049	0.048
		LigAc final	0.712	0.676	0.656	0.52	0.235
		WC final	0.382	0.141	0.072	0.046	0.044
Hamster	2		500	2500	12500	62500	312500
		LigAc	0.784	0.714	0.672	0.603	0.277
		WC	0.373	0.163	0.139	0.111	0.102
		BSA	0.09	0.072	0.058	0.055	0.05
		LigAc final	0.694	0.642	0.614	0.548	0.227
		WC final	0.283	0.091	0.081	0.056	0.052
Hamster	3		500	2500	12500	62500	312500
		LigAc	0.741	0.719	0.676	0.527	0.279
		WC	0.37	0.159	0.097	0.073	0.068
		BSA	0.072	0.055	0.054	0.052	0.051
		LigAc final	0.669	0.664	0.622	0.475	0.228
		WC final	0.298	0.104	0.043	0.021	0.017
Hamster	4		500	2500	12500	62500	312500
		LigAc	0.833	0.796	0.722	0.563	0.254
		WC	0.22	0.089	0.056	0.045	0.041
		BSA	0.129	0.056	0.054	0.052	0.051
		LigAc final	0.704	0.74	0.668	0.511	0.203
		WC final	0.091	0.033	0.002	-0.007	-0.01
Hamster	5		500	2500	12500	62500	312500
		LigAc	0.806	0.731	0.694	0.629	0.246
		WC	0.529	0.492	0.134	0.098	0.061
		BSA	0.187	0.168	0.135	0.055	0.049
		LigAc final	0.619	0.563	0.559	0.574	0.197
		WC final	0.342	0.324	-0.001	0.043	0.012
Hamster	6		500	2500	12500	62500	312500
		LigAc	0.74	0.703	0.663	0.597	0.268
		WC	0.444	0.229	0.165	0.134	0.107
		BSA	0.074	0.062	0.054	0.044	0.04
		LigAc final	0.666	0.641	0.609	0.553	0.228
		WC final	0.37	0.167	0.111	0.09	0.067
Hamster	7		500	2500	12500	62500	312500
		LigAc	0.742	0.698	0.623	0.445	0.134
		WC	0.311	0.111	0.093	0.071	0.068
		BSA	0.071	0.068	0.048	0.047	0.041
		LigAc final	0.671	0.63	0.575	0.398	0.093
		WC final	0.24	0.043	0.045	0.024	0.027
Hamster	8		500	2500	12500	62500	312500
		LigAc	0.754	0.753	0.716	0.504	0.237
		WC	0.138	0.069	0.053	0.052	0.051
		BSA	0.186	0.109	0.066	0.061	0.049
		LigAc final	0.568	0.644	0.65	0.443	0.188
		WC final	-0.048	-0.04	-0.013	-0.009	0.002

## Sheet: Group 3_3
Group 3 LigAc LQ		after the 3rd immunization
Hamster	1		500	2500	12500	62500	312500
		LigAc	0.745	0.74	0.681	0.512	0.119
		WC	0.43	0.19	0.092	0.081	0.071
		BSA	0.137	0.132	0.127	0.073	0.069
		LigAc final	0.608	0.608	0.554	0.439	0.05
		WC final	0.293	0.058	-0.035	0.008	0.002
Hamster	2		500	2500	12500	62500	312500
		LigAc	0.721	0.7	0.65	0.497	0.109
		WC	0.412	0.205	0.186	0.156	0.088
		BSA	0.089	0.074	0.056	0.061	0.041
		LigAc final	0.632	0.626	0.594	0.436	0.068
		WC final	0.323	0.131	0.13	0.095	0.047
Hamster	3		500	2500	12500	62500	312500
		LigAc	0.827	0.796	0.723	0.503	0.141
		WC	0.393	0.13	0.07	0.067	0.06
		BSA	0.079	0.057	0.053	0.048	0.047
		LigAc final	0.748	0.739	0.67	0.455	0.094
		WC final	0.314	0.073	0.017	0.019	0.013
Hamster	4		500	2500	12500	62500	312500
		LigAc	0.784	0.755	0.669	0.529	0.209
		WC	0.328	0.105	0.096	0.074	0.054
		BSA	0.078	0.059	0.048	0.047	0.044
		LigAc final	0.706	0.696	0.621	0.482	0.165
		WC final	0.25	0.046	0.048	0.027	0.01
Hamster	5		500	2500	12500	62500	312500
		LigAc	0.868	0.847	0.773	0.571	0.179
		WC	0.426	0.171	0.105	0.093	0.065
		BSA	0.216	0.061	0.058	0.055	0.054
		LigAc final	0.652	0.786	0.715	0.516	0.125
		WC final	0.21	0.11	0.047	0.038	0.011
Hamster	6		500	2500	12500	62500	312500
		LigAc	0.791	0.715	0.704	0.476	0.219
		WC	0.194	0.109	0.089	0.07	0.061
		BSA	0.204	0.088	0.076	0.06	0.049
		LigAc final	0.587	0.627	0.628	0.416	0.17
		WC final	-0.01	0.021	0.013	0.01	0.012
Hamster	7		500	2500	12500	62500	312500
		LigAc	0.775	0.729	0.645	0.497	0.189
		WC	0.316	0.185	0.141	0.138	0.063
		BSA	0.103	0.103	0.058	0.049	0.046
		LigAc final	0.672	0.626	0.587	0.448	0.143
		WC final	0.213	0.082	0.083	0.089	0.017
Hamster	8		500	2500	12500	62500	312500
		LigAc	0.76	0.735	0.703	0.477	0.257
		WC	0.251	0.119	0.118	0.084	0.08
		BSA	0.113	0.078	0.057	0.05	0.045
		LigAc final	0.647	0.657	0.646	0.427	0.212
		WC final	0.138	0.041	0.061	0.034	0.035

## Sheet: Group 4_3
Group 4 LigAc LQuil		after the 3rd immunization
Hamster	1		500	2500	12500	62500	312500
		LigAc	0.87	0.814	0.743	0.584	0.283
		WC	0.277	0.131	0.111	0.075	0.062
		BSA	0.106	0.101	0.086	0.073	0.072
		LigAc final	0.764	0.713	0.657	0.511	0.211
		WC final	0.171	0.03	0.025	0.002	-0.01
Hamster	2		500	2500	12500	62500	312500
		LigAc	0.775	0.691	0.659	0.532	0.208
		WC	0.411	0.209	0.12	0.083	0.062
		BSA	0.061	0.061	0.055	0.05	0.05
		LigAc final	0.714	0.63	0.604	0.482	0.158
		WC final	0.35	0.148	0.065	0.033	0.012
Hamster	3		500	2500	12500	62500	312500
		LigAc	0.779	0.671	0.645	0.513	0.213
		WC	0.209	0.203	0.164	0.079	0.06
		BSA	0.102	0.061	0.047	0.045	0.041
		LigAc final	0.677	0.61	0.598	0.468	0.172
		WC final	0.107	0.142	0.117	0.034	0.019
Hamster	4		500	2500	12500	62500	312500
		LigAc	0.804	0.743	0.708	0.617	0.251
		WC	0.288	0.186	0.096	0.064	0.052
		BSA	0.074	0.062	0.058	0.041	0.041
		LigAc final	0.73	0.681	0.65	0.576	0.21
		WC final	0.214	0.124	0.038	0.023	0.011
Hamster	5		500	2500	12500	62500	312500
		LigAc	0.784	0.669	0.653	0.591	0.241
		WC	0.41	0.231	0.119	0.106	0.131
		BSA	0.081	0.054	0.046	0.043	0.042
		LigAc final	0.703	0.615	0.607	0.548	0.199
		WC final	0.329	0.177	0.073	0.063	0.089
Hamster	6		500	2500	12500	62500	312500
		LigAc	0.704	0.677	0.605	0.436	0.165
		WC	0.331	0.157	0.138	0.119	0.096
		BSA	0.143	0.094	0.078	0.046	0.044
		LigAc final	0.561	0.583	0.527	0.39	0.121
		WC final	0.188	0.063	0.06	0.073	0.052
Hamster	7		500	2500	12500	62500	312500
		LigAc	0.768	0.741	0.675	0.531	0.199
		WC	0.309	0.168	0.116	0.164	0.085
		BSA	0.05	0.046	0.05	0.058	0.062
		LigAc final	0.718	0.695	0.625	0.473	0.137
		WC final	0.259	0.122	0.066	0.106	0.023
Hamster	8		500	2500	12500	62500	312500
		LigAc	0.788	0.735	0.639	0.475	0.253
		WC	0.384	0.249	0.15	0.121	0.066
		BSA	0.094	0.072	0.059	0.056	0.053
		LigAc final	0.694	0.663	0.58	0.419	0.2
		WC final	0.29	0.177	0.091	0.065	0.013

## Sheet: Group 5_3
Group 5 LigAc SQuil		after the 3rd immunization
Hamster	1		500	2500	12500	62500	312500
		LigAc	0.754	0.651	0.631	0.602	0.249
		WC	0.312	0.236	0.183	0.164	0.12
		BSA	0.119	0.081	0.061	0.058	0.045
		LigAc final	0.635	0.57	0.57	0.544	0.204
		WC final	0.193	0.155	0.122	0.106	0.075
Hamster	2		500	2500	12500	62500	312500
		LigAc	0.855	0.74	0.658	0.533	0.2
		WC	0.324	0.123	0.116	0.094	0.061
		BSA	0.07	0.068	0.05	0.048	0.047
		LigAc final	0.785	0.672	0.608	0.485	0.153
		WC final	0.254	0.055	0.066	0.046	0.014
Hamster	3		500	2500	12500	62500	312500
		LigAc	0.786	0.708	0.645	0.49	0.188
		WC	0.346	0.156	0.122	0.071	0.055
		BSA	0.113	0.081	0.062	0.059	0.056
		LigAc final	0.673	0.627	0.583	0.431	0.132
		WC final	0.233	0.075	0.06	0.012	-0.001
Hamster	4		500	2500	12500	62500	312500
		LigAc	0.824	0.788	0.687	0.501	0.284
		WC	0.307	0.254	0.253	0.242	0.175
		BSA	0.092	0.091	0.058	0.053	0.05
		LigAc final	0.732	0.697	0.629	0.448	0.234
		WC final	0.215	0.163	0.195	0.189	0.125
Hamster	5		500	2500	12500	62500	312500
		LigAc	0.74	0.646	0.625	0.612	0.261
		WC	0.396	0.292	0.22	0.129	0.079
		BSA	0.118	0.094	0.092	0.073	0.072
		LigAc final	0.622	0.552	0.533	0.539	0.189
		WC final	0.278	0.198	0.128	0.056	0.007
Hamster	6		500	2500	12500	62500	312500
		LigAc	0.799	0.698	0.679	0.444	0.204
		WC	0.484	0.258	0.236	0.148	0.187
		BSA	0.077	0.075	0.07	0.064	0.068
		LigAc final	0.722	0.623	0.609	0.38	0.136
		WC final	0.407	0.183	0.166	0.084	0.119
Hamster	7		500	2500	12500	62500	312500
		LigAc	0.791	0.762	0.761	0.702	0.242
		WC	0.345	0.151	0.148	0.144	0.119
		BSA	0.173	0.085	0.073	0.058	0.049
		LigAc final	0.618	0.677	0.688	0.644	0.193
		WC final	0.172	0.066	0.075	0.086	0.07
Hamster	8		500	2500	12500	62500	312500
		LigAc	0.794	0.736	0.683	0.59	0.26
		WC	0.362	0.163	0.139	0.122	0.08
		BSA	0.216	0.152	0.126	0.099	0.09
		LigAc final	0.578	0.584	0.557	0.491	0.17
		WC final	0.146	0.011	0.013	0.023	-0.01
